# Supplementary material for: Time to Mammographic Density Decrease After Exposure to Tamoxifen
Source: PubMed Central journal article supplement — Oncologist. 2022 May 23;27(7):e601–3. doi: 10.1093/oncolo/oyac104 (PMC9256030; doi:10.1093/oncolo/oyac104), 2022-05-23
Supplement: oyac104_suppl_supplementary_figures.pdf [file oyac104_suppl_supplementary_figures.pdf]

Supplemental Figures for:  
 Time to mammographic density decrease after exposure to tamoxifen  
 Magnus Bäcklund et al.

**Supplemental Figure 1. CONSORT diagram for the 723 invited women**

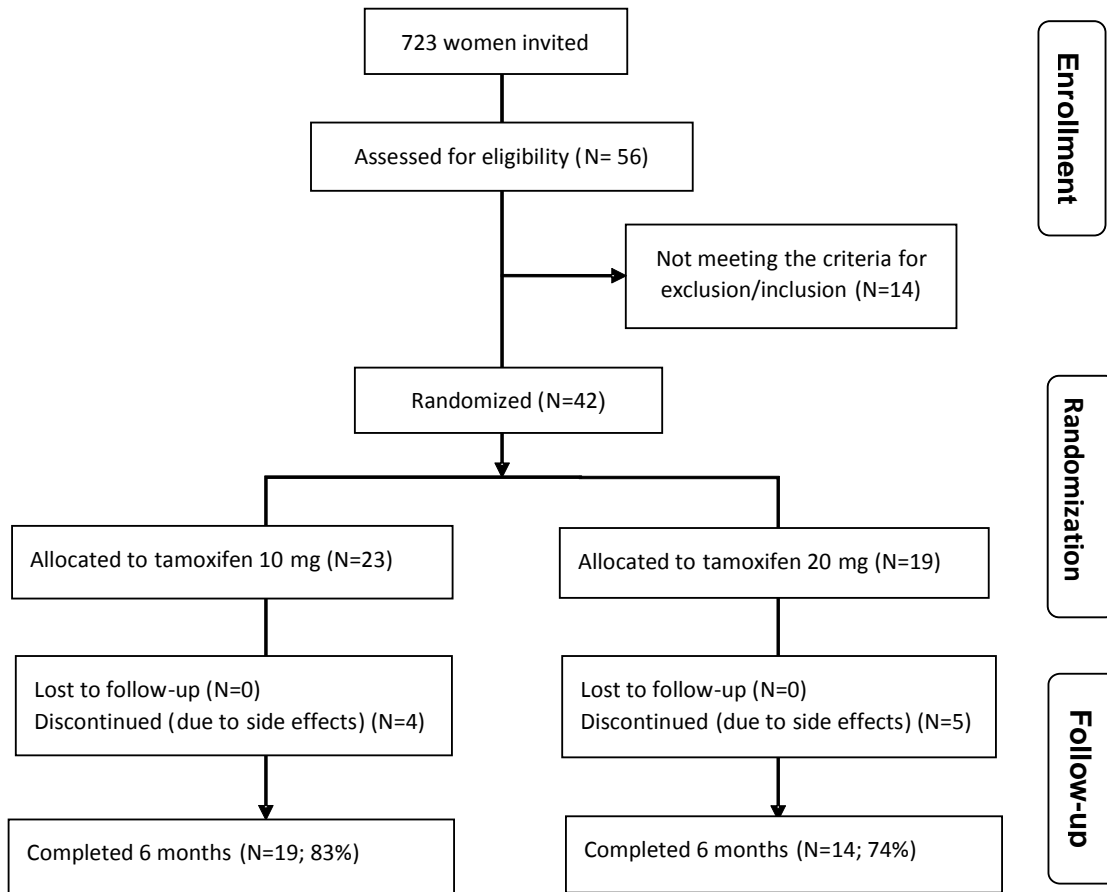

1  
2  
3  
4  
5  
6  
7  
8  
9  
10  
11  
12  
13  
14  
15  
16  
17  
18  
19  
20  
21  
22  
23  
24  
25  
26  
27  
28  
29  
30  
31  
32  
33  
34  
35  
36  
37  
38  
39  
40  
41  
42  
43

44

45

46

47 **Supplemental Figure 2.** Example of a typical decline in density seen in a participant at 3 and 6

48 months, following daily intake of 10 mg tamoxifen.

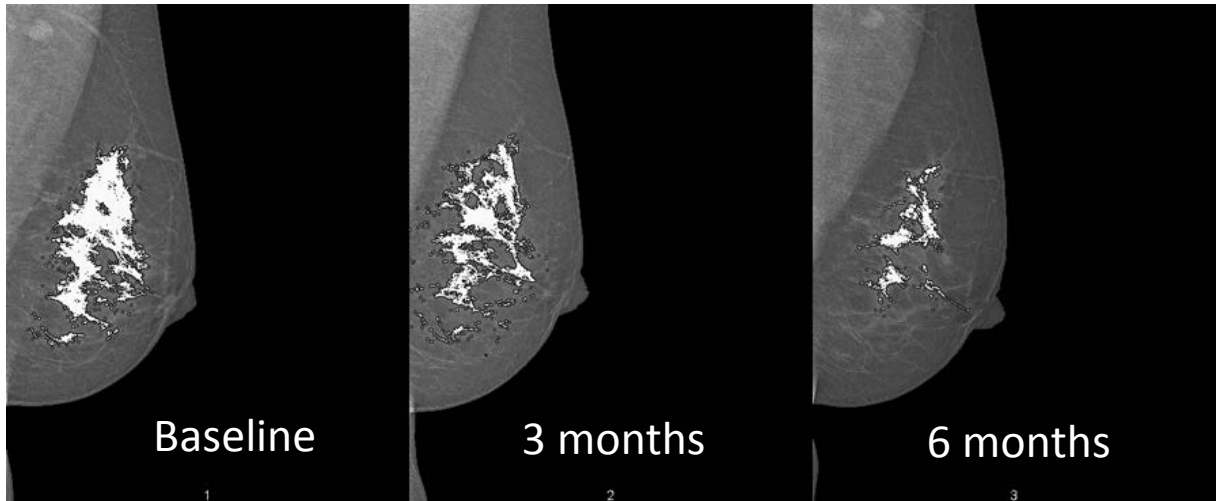

49

50

51
