# Supplementary material for: Time to Mammographic Density Decrease After Exposure to Tamoxifen
Source: PubMed Central journal article supplement — Oncologist. 2022 May 23;27(7):e601–3. doi: 10.1093/oncolo/oyac104 (PMC9256030; doi:10.1093/oncolo/oyac104), 2022-05-23
Supplement: oyac104_suppl_supplementary_table.pdf [file oyac104_suppl_supplementary_table.pdf]

Supplemental Table for:  
Time to mammographic density decrease after exposure to tamoxifen  
Magnus Bäcklund et al.

1 **Supplemental Table 1.** Inclusion and exclusion criteria.

2 **INCLUSION CRITERIA** To participate, the women must meet the following inclusion criteria:

- 3 • Participant of the Karma Cohort
- 4 • Attending the national mammography screening program, *i.e.* aged 40-74
- 5 • Mammogram 3 weeks before start of therapy
- 6 • Mammographic volumetric density >4%, measured by Volpara
- 7 • Informed consent signed before study specific assessments are performed

8 **EXCLUSION CRITERIA** To participate, the women must not meet any of the following exclusion  
9 criteria:

- 10 • Being pregnant or planning to become pregnant during the study
- 11 • Any previous or current diagnosis of breast cancer (including carcinoma in situ)
- 12 • Recalled (mammographic code 3 or above) after baseline screening mammography
- 13 • Any previous diagnosis of cancer, with the exception of non-melanoma skin cancer and  
14 *in situ* cancer of the cervix
- 15 • Currently using oestrogen and progesterone-based hormone replacement therapy
- 16 • Current use of hormone contraceptive with hormones, *e.g.* hormonal contraceptive  
17 pills, or progesterone implants. Hormonal intrauterine devices are accepted.
- 18 • A history of thromboembolic disease such as embolism, deep vein thrombosis, stroke,  
19 TIA or cardiac arrest.
- 20 • A history of immobilization, *e.g.* using wheelchair
- 21 • Known uncontrolled diabetes
- 22 • Hypertension at baseline, defined as systolic pressure higher than 140 mm Hg and  
23 diastolic higher than 90 mm Hg
- 24 • Use of drugs that interfere with CYP2D6 expression such as paroxetine, fluoxetine and  
25 bupropion

26
